# Supplementary material for: Cell cycle–regulated cortical dynein/dynactin promotes symmetric cell division by differential pole motion in anaphase
Source: PubMed Central journal article supplement — Mol Biol Cell. 2012 Sep 1;23(17):3380–90. doi: 10.1091/mbc.E12-02-0109 (PMC3431930; doi:10.1091/mbc.e12-02-0109), 2012-09-01
Supplement: supp_E12-02-0109_CombinedSupMats.pdf [file supp_E12-02-0109_CombinedSupMats.pdf]

## Supplementary Figure Legends

Figure S1, Collins *et al.*

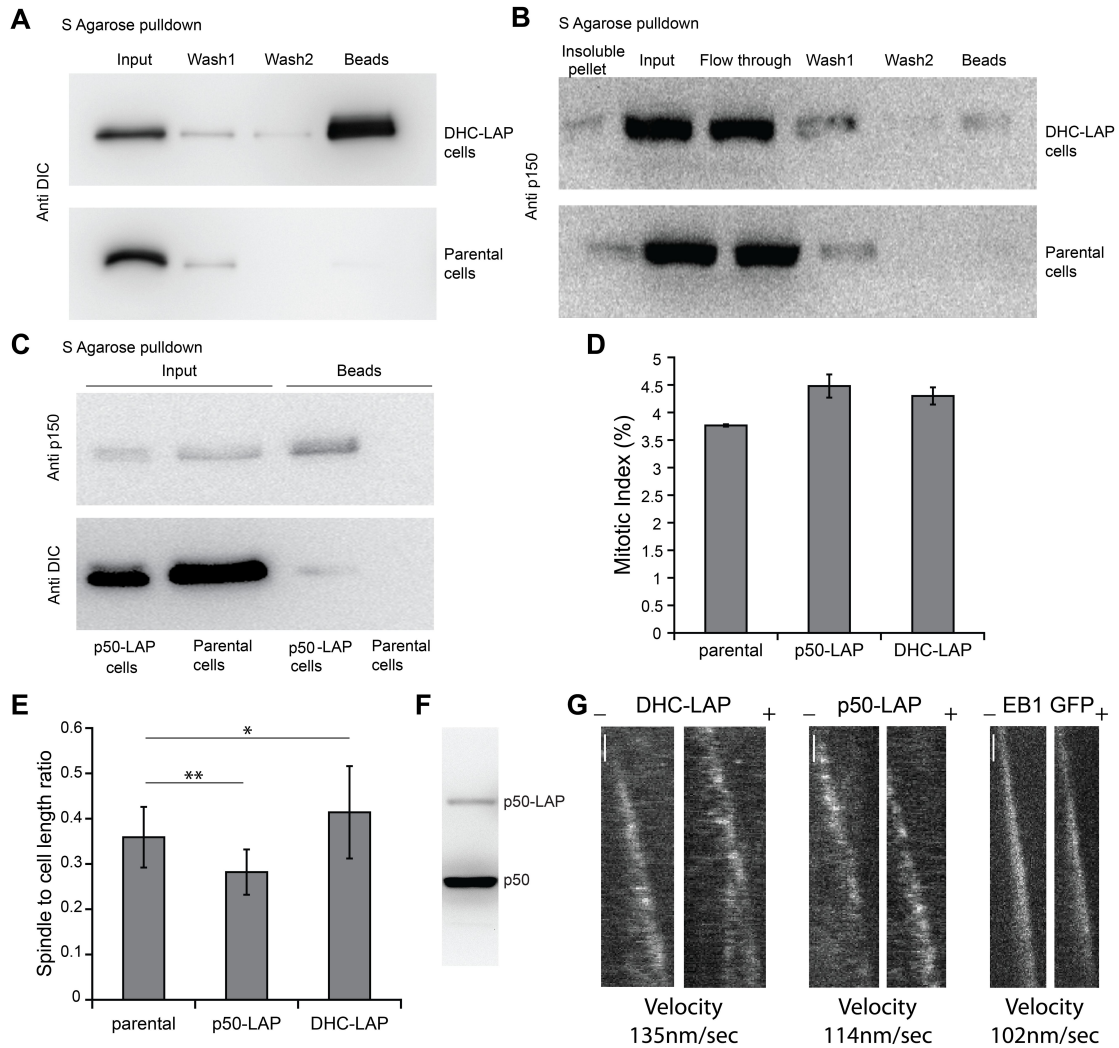

**Figure S1. BAC cell line characterization.** (A-C) Pull down of DHC-LAP and p50-LAP from mitotic cell extracts with S-agarose beads. Western blots using anti-dynein intermediate chain and anti-p150 antibodies demonstrate that native dynein and dynactin are present in the DHC-LAP or p50-LAP bead fraction, but not in the S-agarose beads prepared from parental cells lacking the LAP tag, indicating that DHC-LAP and p50-LAP can associate with, and are likely incorporated into complexes with dynein and

dynactin. (D) The mitotic index ( $n = \geq 268$  cells) and (E) spindle to cell length ratio for the p50- and DHC-LAP cell lines ( $n = \geq 18$  cells). Error bars show standard error. \*  $p \leq 0.05$  and \*\*  $\leq 0.01$ . (F) A Western blot for p50 of the clonal isolate used in these experiments. (G) Kymographs from image series taken in TIRF of cells expressing DHC-LAP, p50-LAP, and EB1-GFP. Kymographs show fluorescent punctae in these cells moving in the plus end direction (away from spindle poles) at similar rates. Scale bar = 1  $\mu\text{m}$  (horizontal) and 2 sec (vertical).

Figure S2, Collins *et al.*

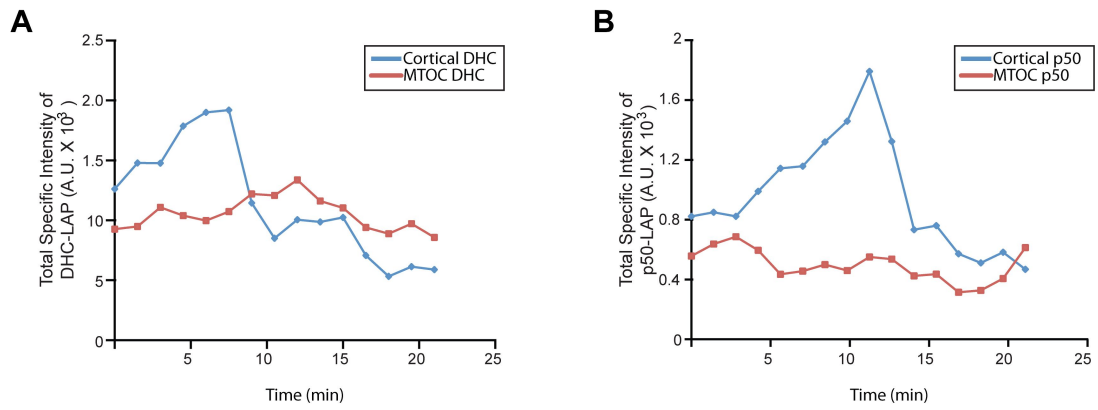

**Figure S2. Fluorescence intensity of DHC-LAP and p50-LAP.** Analysis of the intensity of DHC-LAP (left) and p50-LAP (right) at the cortex of a cell with displaced mitotic spindle, and at the MTOC of a neighboring interphase cell.

Figure S3, Collins *et al.*

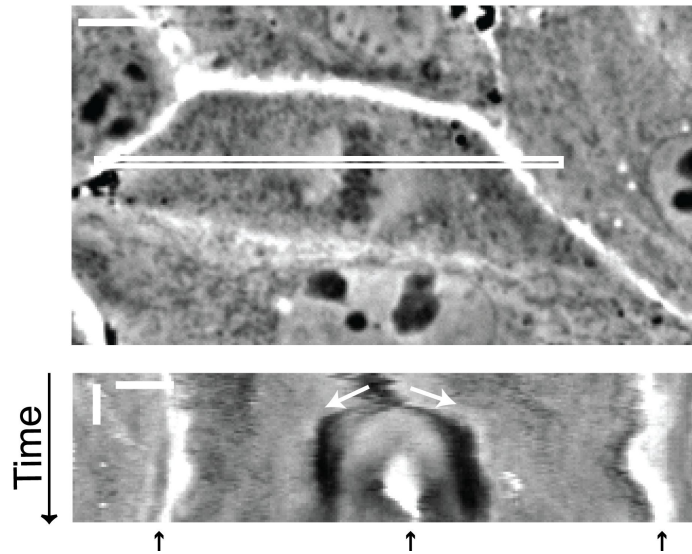

**Figure S3. Symmetric anaphase chromosome movements during anaphase in Class I LLC-Pk1 cells.** Spindle position at the start of a time-lapse series of phase contrast images of a Class I cell and corresponding kymograph of chromosome movement over time. Boxed region shows location used for kymograph. Scale bar = 10  $\mu\text{m}$  (horizontal) and 10 min (vertical). *Black arrow*, cell edges and cleavage furrow; *white arrows* denote chromosome movement.
